# Supplementary material for: Environmental and nutritional assessment of young children’s diets in Norway: comparing the current diet with national dietary guidelines and the EAT-Lancet reference diet
Source: Springer Nature journal article supplement (doi:10.1007/s00394-023-03243-4), 2023-08-31
Supplement: MOESM1 [file 25986218]

## Supplementary Information

### Environmental and nutritional assessment of young children's diets in Norway: comparing the current diet with national dietary guidelines and the EAT-Lancet reference diet

*European Journal of Nutrition*

Ellen Cecilie Wright\*, Bob van Oort, Marie Michaelsen Bjøntegaard, Monica Hauger Carlsen, Lene Frost Andersen

\* Corresponding author: Ellen Cecilie Wright; Department of Nutrition, University of Oslo, Norway; tel.: +47 99744145; e-mail: [e.c.wright@medisin.uio.no](mailto:e.c.wright@medisin.uio.no)

**Supplementary Table S1** Foods included in the food groups

|                             |                             |                                                                                                         |
|-----------------------------|-----------------------------|---------------------------------------------------------------------------------------------------------|
| <b>Grain products</b>       |                             | Raw grains and breakfast cereals<br>Bread and porridge<br>Uncooked white and whole grain pasta and rice |
| <b>Potatoes</b>             |                             | Raw potatoes                                                                                            |
| <b>Vegetables</b>           | Dark green vegetables       | Raw and boiled spinach and broccoli                                                                     |
|                             | Red, orange vegetables      | Raw and boiled carrots<br>Raw tomatoes and red pepper<br>Ketchup, tomato paste and crushed tomatoes     |
|                             | Other vegetables            | Raw cucumber, avocado, sweet corn, sugar snaps, cauliflower and onion                                   |
| <b>Fruit, incl. juice</b>   | Fruit and berries           | Raw fruit and berries (mainly apple, banana, blueberries and orange)<br>Raisins                         |
|                             | Fruit smoothies             | Fruit smoothies without added sugar                                                                     |
|                             | Fruit juice                 | Fruit juice without added sugar                                                                         |
| <b>Legumes</b>              |                             | Dried, frozen or fresh beans, lentils and peas                                                          |
| <b>Nuts</b>                 | Nuts                        | Raw peanuts and tree nuts; peanut butter                                                                |
| <b>Added vegetable fats</b> | Vegetable oils              | Mainly olive, rapeseed, sunflower and soy oil                                                           |
|                             | Margarine                   | Liquid and soft margarine based on vegetable oils                                                       |
| <b>Dairy products</b>       | Milk                        | Whole, semi-skimmed and skimmed milk<br>Milk with flavour                                               |
|                             | Yoghurt                     | Drinking yoghurt, yoghurt and "skyr"                                                                    |
|                             | Cheese                      | Hard cheese, cheese spread and "brunost"                                                                |
|                             | Butter                      | Butter and butter mixes (Bremykt)                                                                       |
| <b>Red meat</b>             | Whole and minced red meat   | Raw whole and minced meat of beef, pork and lamb                                                        |
|                             | Processed red meat products | Processed meat products with beef, pork or lamb (sausage, ham, salami, liver paste, etc.)               |
| <b>Poultry</b>              | Whole and minced poultry    | Raw whole and minced meat of chicken and turkey                                                         |
|                             | Processed poultry products  | Processed meat products with chicken or turkey (sausage, ham, liver paste, etc.)                        |
| <b>Eggs</b>                 |                             | Raw eggs                                                                                                |
| <b>Fish</b>                 | Lean fish                   | Raw fillets of cod and other white fish                                                                 |
|                             | Fatty fish                  | Raw fillets of salmon and other fatty fish                                                              |
|                             | Processed fish products     | Processed fish products (fish cakes, fish fingers, etc.)                                                |

|                       |                                       |                                                                                   |
|-----------------------|---------------------------------------|-----------------------------------------------------------------------------------|
| <b>Sweets</b>         | Sweets, cakes and desserts            | Jam, sweets, chocolate, cakes, sweet biscuits, ice-cream, etc.                    |
|                       | Sugar-sweetened beverages             | Juice concentrate, soda and other sugar-sweetened drinks                          |
|                       | Artificially sweetened beverages      | Juice concentrate, soda and other artificially sweetened drinks                   |
| <b>Drinking water</b> |                                       | Tap water, mineral water                                                          |
| <b>Other</b>          | Plant-based beverages                 | Mainly oat milk                                                                   |
|                       | Formula milk                          | Mainly toddler formula prepared from powder                                       |
|                       | Industrially produced toddler dinners | Ready-to-eat dinner meals including potatoes, vegetables, pasta, meat and/or fish |
|                       | Added salt and condiments             | Salt, herbs, etc.                                                                 |

**Supplementary Table S2** Food composition in the current diet among 2-year-olds in Norway (Småbarnskost 3,  $n = 1413$ ) [1], the FBDG scenario diet and the EAT-*Lancet* scenario diet

|                                | <b>Småbarnskost 3</b> |                 | <b>FBDG scenario diet</b> |                 | <b>EAT-<i>Lancet</i> scenario diet</b> |                 |
|--------------------------------|-----------------------|-----------------|---------------------------|-----------------|----------------------------------------|-----------------|
|                                | Food (g/day)          | Energy (kJ/day) | Food (g/day)              | Energy (kJ/day) | Food (g/day)                           | Energy (kJ/day) |
| <b>Total</b>                   | <b>1729</b>           | <b>5293</b>     | <b>1874</b>               | <b>5303</b>     | <b>1639</b>                            | <b>5308</b>     |
| <b>Grain products</b>          | <b>222</b>            | <b>1694</b>     | <b>264</b>                | <b>2073</b>     | <b>295</b>                             | <b>2054</b>     |
| Whole-grain bread <sup>a</sup> | 89                    | 874             | 80                        | 791             | 80                                     | 787             |
| White bread <sup>b</sup>       | 31                    | 294             | 35                        | 352             | 0                                      | 0               |
| Whole-grain porridge           | 87                    | 305             | 100                       | 174             | 150                                    | 261             |
| Rice and pasta <sup>c</sup>    | 6                     | 96              | 30                        | 461             | 30                                     | 461             |
| Other grains                   | 9                     | 124             | 19                        | 296             | 35                                     | 545             |
| <b>Potatoes</b>                | <b>14</b>             | <b>46</b>       | <b>30</b>                 | <b>102</b>      | <b>25</b>                              | <b>85</b>       |
| <b>Vegetables</b>              | <b>71</b>             | <b>163</b>      | <b>188</b>                | <b>269</b>      | <b>152</b>                             | <b>186</b>      |
| <b>Fruit, incl. juice</b>      | <b>217</b>            | <b>563</b>      | <b>187</b>                | <b>630</b>      | <b>101</b>                             | <b>260</b>      |
| Fruit and berries              | 129                   | 352             | 187                       | 630             | 101                                    | 260             |
| Fruit smoothies                | 58                    | 156             | 0                         | 0               | 0                                      | 0               |
| Fruit juice                    | 30                    | 55              | 0                         | 0               | 0                                      | 0               |
| <b>Legumes</b>                 | <b>6</b>              | <b>28</b>       | <b>15</b>                 | <b>166</b>      | <b>38</b>                              | <b>553</b>      |
| <b>Nuts</b>                    | <b>0</b>              | <b>7</b>        | <b>10</b>                 | <b>260</b>      | <b>26</b>                              | <b>676</b>      |
| <b>Added vegetable fats</b>    | <b>12</b>             | <b>274</b>      | <b>15</b>                 | <b>407</b>      | <b>20</b>                              | <b>733</b>      |
| Vegetable oils                 | 1                     | 35              | 5                         | 183             | 20                                     | 733             |
| Margarine                      | 11                    | 239             | 10                        | 224             | 0                                      | 0               |
| <b>Dairy products</b>          | <b>489</b>            | <b>1495</b>     | <b>260</b>                | <b>619</b>      | <b>128</b>                             | <b>262</b>      |
| Milk                           | 357                   | 655             | 160                       | 247             | 80                                     | 124             |
| Yoghurt                        | 104                   | 372             | 90                        | 260             | 48                                     | 139             |
| Cheese                         | 21                    | 268             | 10                        | 112             | 0                                      | 0               |
| Butter                         | 7                     | 200             | 0                         | 0               | 0                                      | 0               |
| <b>Red meat</b>                | <b>31</b>             | <b>280</b>      | <b>25</b>                 | <b>126</b>      | <b>8</b>                               | <b>69</b>       |
| Whole and minced red meat      | 7                     | 42              | 15                        | 82              | 8                                      | 69              |
| Processed red meat             | 24                    | 238             | 10                        | 43              | 0                                      | 0               |
| <b>Poultry</b>                 | <b>7</b>              | <b>39</b>       | <b>20</b>                 | <b>98</b>       | <b>15</b>                              | <b>75</b>       |
| Whole and minced poultry       | 4                     | 23              | 15                        | 70              | 10                                     | 47              |
| Processed poultry              | 3                     | 16              | 5                         | 28              | 5                                      | 28              |
| <b>Eggs</b>                    | <b>12</b>             | <b>71</b>       | <b>10</b>                 | <b>62</b>       | <b>7</b>                               | <b>43</b>       |
| <b>Fish</b>                    | <b>32</b>             | <b>226</b>      | <b>40</b>                 | <b>262</b>      | <b>14</b>                              | <b>84</b>       |
| Lean fish                      | 3                     | 10              | 10                        | 35              | 8                                      | 28              |
| Fatty fish                     | 8                     | 76              | 20                        | 188             | 6                                      | 56              |
| Processed fish products        | 21                    | 139             | 10                        | 40              | 0                                      | 0               |
| <b>Sweets</b>                  | <b>89</b>             | <b>330</b>      | <b>30</b>                 | <b>229</b>      | <b>30</b>                              | <b>229</b>      |
| Sweets, cakes and desserts     | 15                    | 250             | 10                        | 192             | 10                                     | 192             |
| Sugar-sweetened beverages      | 42                    | 80              | 20                        | 37              | 20                                     | 37              |

|                                       |            |           |            |          |            |          |
|---------------------------------------|------------|-----------|------------|----------|------------|----------|
| Artificially sweetened beverages      | 32         | 1         | 0          | 0        | 0          | 0        |
| <b>Drinking water</b>                 | <b>475</b> | <b>0</b>  | <b>780</b> | <b>0</b> | <b>780</b> | <b>0</b> |
| <b>Other</b>                          | <b>29</b>  | <b>82</b> | <b>0</b>   | <b>0</b> | <b>0</b>   | <b>0</b> |
| Plant-based beverages                 | 9          | 20        |            |          |            |          |
| Formula milk                          | 14         | 40        |            |          |            |          |
| Industrially produced toddler dinners | 5          | 15        |            |          |            |          |
| Added salt, condiments, etc.          | 1          | 7         |            |          |            |          |

<sup>a</sup> Whole-grain content  $\geq 50\%$

<sup>b</sup> Whole-grain content  $< 50\%$

<sup>c</sup> Current diet includes whole-grain and refined rice and pasta. The scenario diets include whole-grain only.

**Supplementary Table S3** Content of macro- and micronutrients in the three EAT-*Lancet* scenario diets and the recommended intake for children aged 2-5 years according to the Norwegian nutrition recommendations [2]. The EAT-*Lancet* scenario follows the target values of the EAT-*Lancet* reference diet [3] adjusted for an energy intake of 5.3 MJ/d. The EAT-*Lancet* dairy and dairy & fish scenarios are based on the first scenario but includes double amounts of dairy products and dairy and fish products, respectively, still within the recommended intake ranges of the EAT-*Lancet* reference diet adjusted to 5.3 MJ/d

|                                 | EAT- <i>Lancet</i> | EAT- <i>Lancet</i><br>dairy | EAT- <i>Lancet</i><br>dairy & fish | Recommended intake |
|---------------------------------|--------------------|-----------------------------|------------------------------------|--------------------|
| Energy (MJ)                     | 5.3                | 5.3                         | 5.3                                | 5.3                |
| Protein (E%)                    | 16                 | 18                          | 19                                 | 10-20              |
| Total fat (E%)                  | 37                 | 33                          | 32                                 | 25-40              |
| <i>Saturated fat (E%)</i>       | 6                  | 7                           | 7                                  | $< 10$             |
| <i>Monounsaturated fat (E%)</i> | 17                 | 14                          | 14                                 | 10-20              |
| <i>Polyunsaturated fat (E%)</i> | 10                 | 9                           | 8                                  | 5-10               |
| Total carbs. (E%)               | 43                 | 45                          | 45                                 | 45-60              |
| <i>Added sugar (E%)</i>         | 2                  | 2                           | 2                                  | $< 10$             |
| Dietary fibre (g/MJ)            | 5                  | 5                           | 5                                  | $> 2-3$            |
| Whole grain (g/MJ)              | 22                 | 22                          | 22                                 | $> 7.5$            |
| Vitamin A ( $\mu\text{g}$ )     | 428                | 452                         | 455                                | 350                |
| Vitamin D ( $\mu\text{g}$ )     | 1.3                | 1.6                         | 2.4                                | 10                 |
| Vitamin E (mg)                  | 14                 | 12                          | 11                                 | 5                  |
| Thiamine (mg)                   | 1.3                | 1.4                         | 1.4                                | 0.6                |
| Riboflavin (mg)                 | 0.8                | 1.0                         | 1.0                                | 0.7                |
| Niacin (mg)                     | 11                 | 11                          | 12                                 | 9                  |
| B6 (mg)                         | 1.2                | 1.3                         | 1.3                                | 0.7                |
| Folate ( $\mu\text{g}$ )        | 296                | 302                         | 303                                | 80                 |
| B12 ( $\mu\text{g}$ )           | 1.7                | 2.5                         | 2.9                                | 0.8                |
| Vitamin C (mg)                  | 59                 | 59                          | 59                                 | 30                 |
| Calcium (mg)                    | 419                | 600                         | 601                                | 600                |
| Iron (mg)                       | 10.6               | 10.6                        | 10.6                               | 8                  |
| Zinc (mg)                       | 7.5                | 8.1                         | 8.1                                | 6                  |
| Iodine ( $\mu\text{g}$ )        | 55                 | 76                          | 99                                 | 90                 |
| Salt (g)                        | 1.6                | 1.8                         | 1.8                                | $< 3-4$            |

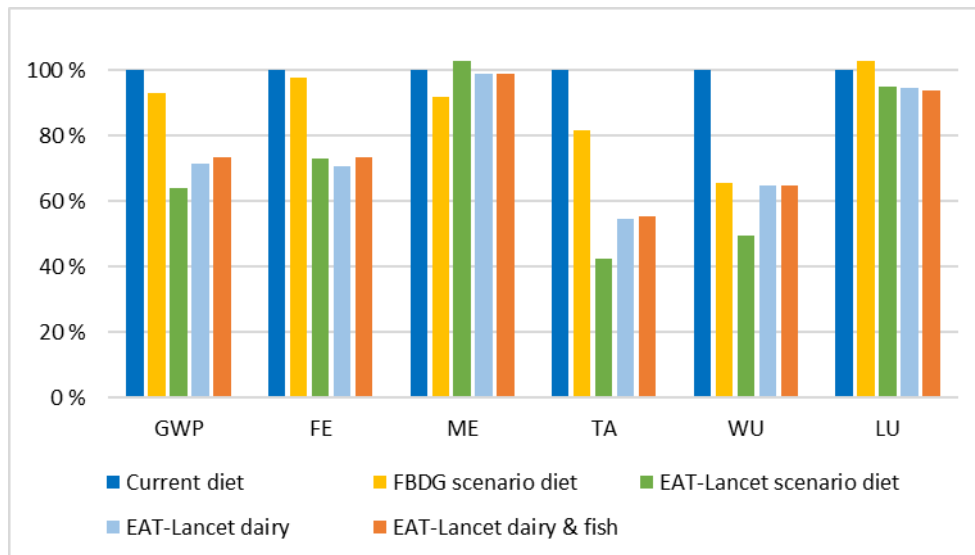

**Supplementary Fig. S1** Total environmental impact per impact category from the scenario diets in relation to the impacts from the current diet among 2-year-olds in Norway (Småbarnskost 3,  $n = 1413$ ) [1]. FE, freshwater eutrophication; GWP, global warming potential; LU, land use; ME, marine eutrophication; TA, terrestrial acidification; WU, water use

#### References:

1. Astrup, H., et al., *Småbarnskost 3. Landsomfattende undersøkelse av kostholdet blant 2-åringer i Norge [in Norwegian]*. 2020: Oslo.
2. Norwegian Directorate of Health, *Anbefalinger om kosthold, ernæring og fysisk aktivitet [in Norwegian]*. 2014: Oslo.
3. Willett, W., et al., *Food in the Anthropocene: the EAT-Lancet Commission on healthy diets from sustainable food systems*. *Lancet*, 2019. **393**(10170): p. 447-492.
